# Supplementary material
Source: PubMed Central journal article supplement (PMC3946533)
Supplement: NIHMS522412-supplement-1_si_001.pdf [file NIHMS522412-supplement-1_si_001.pdf]

## Supplementary Information

Supplementary Table 1. PNA-RNA duplex models with corresponding melting temperatures measured by CD.

| Duplex                                                                                                                                                             | Sequence label | Sequence*                                                            | T <sub>m</sub> , °C† |
|--------------------------------------------------------------------------------------------------------------------------------------------------------------------|----------------|----------------------------------------------------------------------|----------------------|
| 1                                                                                                                                                                  | pD12           | N-SBTG <sub>2</sub> -DAP-AEEA-GCCATCAGCTCC-AEEA-D(Cys-Ser-Lys-Cys)-C | 79 ± 1.0             |
|                                                                                                                                                                    | mD12           | 5'-rAGUUGGAGCUGAUGGCGUAG-3'                                          |                      |
| 2                                                                                                                                                                  | pD12           | N-SBTG <sub>2</sub> -DAP-AEEA-GCCATCAGCTCC-AEEA-D(Cys-Ser-Lys-Cys)-C | 65 ± 1.7             |
|                                                                                                                                                                    | mG12           | 5'-rAGUUGGAGCUGUGGCGUAG-3'                                           |                      |
| 3                                                                                                                                                                  | pG12           | N-SBTG <sub>2</sub> -DAP-AEEA-GCCACCAGCTCC-AEEA-D(Cys-Ser-Lys-Cys)-C | 82 ± 1.0             |
|                                                                                                                                                                    | mG12           | 5'-rAGUUGGAGCUGUGGCGUAG-3'                                           |                      |
| 4                                                                                                                                                                  | pG12           | N-SBTG <sub>2</sub> -DAP-AEEA-GCCACCAGCTCC-AEEA-D(Cys-Ser-Lys-Cys)-C | 66 ± 0.9             |
|                                                                                                                                                                    | mV12           | 5'-AGUUGGAGCUGUUGGCGUAG-3'                                           |                      |
| 5                                                                                                                                                                  | pG12           | N-SBTG <sub>2</sub> -DAP-AEEA-GCCACCAGCTCC-AEEA-D(Cys-Ser-Lys-Cys)-C | 67 ± 1.1             |
|                                                                                                                                                                    | mD12           | 5'-rAGUUGGAGCUGAUGGCGUAG-3'                                          |                      |
| 6                                                                                                                                                                  | pV12           | N-SBTG <sub>2</sub> -DAP-AEEA-GCCAACAGCTCC-AEEA-D(Cys-Ser-Lys-Cys)-C | 78 ± 0.6             |
|                                                                                                                                                                    | mV12           | 5'-AGUUGGAGCUGUUGGCGUAG-3'                                           |                      |
| 7                                                                                                                                                                  | pV12           | N-SBTG <sub>2</sub> -DAP-AEEA-GCCAACAGCTCC-AEEA-D(Cys-Ser-Lys-Cys)-C | 69 ± 0.3             |
|                                                                                                                                                                    | mG12           | 5'-rAGUUGGAGCUGUGGCGUAG-3'                                           |                      |
| 8                                                                                                                                                                  | pDVA12         | N-SBTG <sub>2</sub> -DAP-AEEA-GCCAHCAGCTCC-AEEA-D(Cys-Ser-Lys-Cys)-C | 72 ± 0.9             |
|                                                                                                                                                                    | mD12           | 5'-rAGUUGGAGCUGAUGGCGUAG-3'                                          |                      |
| 9                                                                                                                                                                  | pDVA12         | N-SBTG <sub>2</sub> -DAP-AEEA-GCCAHCAGCTCC-AEEA-D(Cys-Ser-Lys-Cys)-C | 66 ± 3.5             |
|                                                                                                                                                                    | mG12           | 5'-rAGUUGGAGCUGUGGCGUAG-3'                                           |                      |
| 10                                                                                                                                                                 | pDVA12         | N-SBTG <sub>2</sub> -DAP-AEEA-GCCAHCAGCTCC-AEEA-D(Cys-Ser-Lys-Cys)-C | 72 ± 0.5             |
|                                                                                                                                                                    | mV12           | 5'-AGUUGGAGCUGUUGGCGUAG-3'                                           |                      |
| *The position of mutation in the twelfth codon (underlined) is colored red. †T <sub>m</sub> values were calculated from the first derivative of the melting curve. |                |                                                                      |                      |

Supplementary Table 2. Average values helical parameters PNA-RNA duplexes calculated over 25.0 ns MD simulations. The error values represent the standard error.

| Duplex      | Helical Twist (°) | Helical Rise (Å) | Shift (Å)  | Slide (Å)   | Rise (Å)   | Tilt (°)    | Roll (°)   | Twist (°)  |
|-------------|-------------------|------------------|------------|-------------|------------|-------------|------------|------------|
| pD12-mD12   | 26.1 ± 4          | 2.76 ± 0.4       | 0.55 ± 0.6 | -2.03 ± 0.5 | 3.31 ± 0.4 | -0.22 ± 4.7 | 5.63 ± 5.8 | 25.3 ± 4.2 |
| pD12-mG12   | 26.6 ± 6          | 2.71 ± 0.4       | 0.53 ± 0.6 | -2.02 ± 0.5 | 3.27 ± 0.3 | 0.26 ± 4.9  | 6.01 ± 5.9 | 25.7 ± 6.3 |
| pG12-mG12   | 25.9 ± 4          | 2.74 ± 0.4       | 0.54 ± 0.6 | -2.11 ± 0.4 | 3.31 ± 0.3 | -0.54 ± 4.6 | 5.43 ± 5.6 | 25.1 ± 4.4 |
| pG12-mD12   | 25.2 ± 9          | 2.58 ± 0.7       | 0.63 ± 0.8 | -2.07 ± 0.6 | 3.33 ± 0.5 | -1.36 ± 5.7 | 5.95 ± 6.5 | 23.9 ± 10  |
| pG12-mV12   | 26.8 ± 9          | 2.58 ± 0.6       | 0.55 ± 0.6 | -1.97 ± 0.5 | 3.29 ± 0.4 | -1.29 ± 5.9 | 6.67 ± 6.4 | 25.5 ± 10  |
| pV12-mV12   | 25.9 ± 4          | 2.77 ± 0.5       | 0.56 ± 0.7 | -2.00 ± 0.5 | 3.32 ± 0.4 | -0.38 ± 5.0 | 5.75 ± 6.0 | 25.1 ± 4.9 |
| pV12-mG12   | 25.8 ± 15         | 2.44 ± 0.9       | 0.64 ± 1.0 | -1.93 ± 0.9 | 3.30 ± 0.4 | -1.20 ± 5.8 | 7.21 ± 6.6 | 24.1 ± 15  |
| pDVA12-mD12 | 26.1 ± 5          | 2.68 ± 0.6       | 0.56 ± 0.9 | -2.00 ± 0.7 | 3.33 ± 0.4 | -0.43 ± 5.7 | 6.43 ± 6.4 | 24.3 ± 9.6 |
| pDVA12-mG12 | 23.2 ± 17         | 2.65 ± 1.2       | 0.70 ± 1.6 | -2.02 ± 1.3 | 3.39 ± 1.2 | -0.12 ± 11  | 6.27 ± 10  | 21.9 ± 16  |
| pDVA12-mV12 | 26.7 ± 7          | 2.67 ± 0.5       | 0.55 ± 0.6 | -1.95 ± 0.5 | 3.30 ± 0.4 | -0.56 ± 5.3 | 6.59 ± 6.3 | 25.6 ± 7.4 |

Supplementary Table 3. MM-PBSA results for each PNA-RNA duplex using the last 6ns of each 25 ns MD simulation. Errors represent the standard deviation of 3 independent MD runs.

| Duplex      | $\Delta E^{ele*}$ | $\Delta E^{vdW**}$ | $\Delta G^{PB***}$ | $\Delta G^{SA****}$ | $\Delta H^{MM-PBSA}$ | T $\Delta S$    | $\Delta G^{calc}$ | T $_m^{calc}$ | T $_m^{exp}$  |
|-------------|-------------------|--------------------|--------------------|---------------------|----------------------|-----------------|-------------------|---------------|---------------|
| pD12-mD12   | -131.8 $\pm$ 1.0  | -70.7 $\pm$ 1.0    | 79.5 $\pm$ 10      | -6.19 $\pm$ 0.0     | -129.2 $\pm$ 1.0     | -46.7 $\pm$ 1.8 | -82.5 $\pm$ 2.4   | 696           | 352 $\pm$ 1.0 |
| pG12-mG12   | -160.0 $\pm$ 9.4  | -70.9 $\pm$ 0.5    | 102.2 $\pm$ 8.9    | -6.26 $\pm$ 0.0     | -134.9 $\pm$ 1.1     | -50.3 $\pm$ 1.6 | -84.7 $\pm$ 2.7   | 683           | 356 $\pm$ 1.0 |
| pG12-mD12   | -141.3 $\pm$ 11   | -71.7 $\pm$ 0.7    | 90.3 $\pm$ 11      | -6.29 $\pm$ 0.0     | -129.0 $\pm$ 0.6     | -47.8 $\pm$ 1.4 | -81.3 $\pm$ 1.9   | 682           | 341 $\pm$ 1.0 |
| pV12-mV12   | -146.2 $\pm$ 7.2  | -69.7 $\pm$ 0.3    | 93.3 $\pm$ 6.4     | -6.19 $\pm$ 0.0     | -128.7 $\pm$ 0.6     | -47.9 $\pm$ 2.9 | -80.8 $\pm$ 3.1   | 679           | 351 $\pm$ 0.6 |
| pDVA12-mD12 | -138.8 $\pm$ 8.7  | -70.4 $\pm$ 1.9    | 88.9 $\pm$ 12      | -6.25 $\pm$ 0.2     | -126.6 $\pm$ 2.4     | -42.2 $\pm$ 1.8 | -84.5 $\pm$ 3.7   | 744           | 345 $\pm$ 0.9 |
| pDVA12-mG12 | -136.16 $\pm$ 26  | -71.5 $\pm$ 1.3    | 91.7 $\pm$ 20      | -6.52 $\pm$ 0.3     | -118.8 $\pm$ 3.3     | -44.9 $\pm$ 1.7 | -73.8 $\pm$ 4.0   | 661           | 339 $\pm$ 3.5 |
| pDVA12-mV12 | -139.64 $\pm$ 16  | -70.3 $\pm$ 0.8    | 87.8 $\pm$ 16      | -6.18 $\pm$ 0.1     | -128.3 $\pm$ 0.6     | -44.2 $\pm$ 2.0 | -84.2 $\pm$ 2.4   | 725           | 346 $\pm$ 0.5 |

All energy units are given in kcal/mol, Temperatures are in K.  
\*  $\Delta E^{ele}$ : Coulombic energy.  
\*\*  $\Delta E^{vdW}$ : van der Waals energy.  
\*\*\*  $\Delta G^{PB}$ : Poisson-Boltzmann polar solvation energy  
\*\*\*\*  $\Delta G^{SA}$ : non-polar solvation energy

Supplementary Table 4. . MM-PBSA results for each PNA-RNA duplex using the 50ns of each aMD simulation.

| Duplex      | $\Delta E^{ele*}$ | $\Delta E^{vdW**}$ | $\Delta G^{PB***}$ | $\Delta G^{SA****}$ | $\Delta H^{MM-PBSA}$ | T $\Delta$ S | $\Delta G^{calc}$ | T $m^{calc}$ | T $m^{exp}$ |
|-------------|-------------------|--------------------|--------------------|---------------------|----------------------|--------------|-------------------|--------------|-------------|
| pD12-mD12   | -130.9            | -75.1              | 91.4               | -6.6                | -121.2               | -46.11       | -75.2             | 660          | 352 ± 1.0   |
| pG12-mG12   | -162.8            | -71.0              | 113.8              | -6.3                | -126.4               | -44.75       | -81.6             | 706          | 356 ± 1.0   |
| pG12-mD12   | -260.9            | -84.5              | 251.7              | -7.5                | -101.3               | -39.5        | -61.8             | 627          | 341 ± 1.0   |
| pV12-mV12   | -193.5            | -72.9              | 156.1              | -6.6                | -116.9               | -44.32       | -72.5             | 658          | 351 ± 0.6   |
| pDVA12-mD12 | -149.0            | -82.55             | 122.1              | -7.5                | -116.9               | -45.69       | -71.3             | 642          | 345 ± 0.9   |
| pDVA12-mG12 | -152.4            | -77.4              | 122.0              | -6.8                | -114.6               | -47.83       | -66.8             | 605          | 339 ± 3.5   |
| pDVA12-mV12 | -145.9            | -69.7              | 99.5               | -6.2                | -122.3               | -46.63       | -75.7             | 660          | 346 ± 0.5   |

All energy units are given in kcal/mol, Temperatures are in K.  
\*  $\Delta E^{ele}$ : Coulombic energy.  
\*\*  $\Delta E^{vdW}$ : van der Waals energy.  
\*\*\*  $\Delta G^{PB}$ : Poisson-Boltzmann polar solvation energy  
\*\*\*\*  $\Delta G^{SA}$ : non-polar solvation energy

Supplementary Table 5. Average values helical parameters PNA-RNA duplexes calculated over 50.0 ns aMD simulations. The error values represent the standard deviation.

| Duplex      | Helical Twist (°) | Helical Rise (Å) | Shift (Å)  | Slide (Å)   | Rise (Å)   | Tilt (°)    | Roll (°)   | Twist (°)  |
|-------------|-------------------|------------------|------------|-------------|------------|-------------|------------|------------|
| pD12-mD12   | 26.4 ± 5.0        | 2.77 ± 0.3       | 0.57 ± 0.1 | -1.93 ± 0.4 | 2.77 ± 0.3 | -0.61 ± 1.6 | 6.03 ± 2.9 | 25.4 ± 5.3 |
| pG12-mG12   | 26.8 ± 1.6        | 2.69 ± 0.1       | 0.51 ± 0.1 | -1.94 ± 0.2 | 2.69 ± 0.1 | -0.78 ± 1.4 | 6.75 ± 2.6 | 25.6 ± 1.6 |
| pG12-mD12   | 15.4 ± 13         | 1.1 ± 0.9        | 0.78 ± 0.4 | -1.27 ± 1.2 | 1.10 ± 0.9 | -7.56 ± 6.0 | 17.2 ± 10  | 10.5 ± 13  |
| pV12-mV12   | 26.4 ± 4.0        | 2.59 ± 0.2       | 0.64 ± 0.2 | -1.96 ± 0.2 | 2.59 ± 0.2 | -2.29 ± 1.9 | 6.35 ± 1.9 | 24.8 ± 4.2 |
| pDVA12-mD12 | 24.3 ± 5.8        | 2.97 ± 0.5       | 0.92 ± 0.1 | -1.26 ± 0.6 | 2.97 ± 0.5 | 0.92 ± 4.6  | 7.53 ± 4.4 | 22.5 ± 6.6 |
| pDVA12-mG12 | 24.4 ± 6.3        | 2.24 ± 0.5       | 0.81 ± 1.0 | -1.61 ± 0.6 | 2.24 ± 0.5 | 0.58 ± 2.3  | 9.52 ± 3.7 | 21.5 ± 6.8 |
| pDVA12-mV12 | 26.9 ± 6.1        | 2.76 ± 0.2       | 0.66 ± 0.3 | -1.51 ± 0.3 | 2.76 ± 0.2 | -0.46 ± 2.1 | 6.76 ± 3.1 | 25.7 ± 6.4 |

Supplementary Table 6. Average values of base and helical parameters of the 8<sup>th</sup> position and effects of hypoxanthine substitutions during 50.0 ns aMD simulations. The error values represent the standard deviation.

| Duplex      | Base pair at 8 <sup>th</sup> position | Shear (Å)   | Stretch (Å) | Opening (°) |
|-------------|---------------------------------------|-------------|-------------|-------------|
| pD12-mD12   | T-A                                   | -0.1 ± 0.01 | 0.03 ± 0.01 | 3.2 ± 0.3   |
| pG12-mG12   | C-G                                   | 0.0 ± 0.02  | 0.02 ± 0.01 | 0.9 ± 0.2   |
| pG12-mD12   | C-A                                   | -1.9 ± 0.2  | 0.8 ± 0.3   | 20 ± 2.8    |
| pG12-mV12   | C-U                                   | -2.9 ± 0.1  | -1.7 ± 0.04 | -1.6 ± 0.6  |
| pV12-mV12   | A-U                                   | -0.0 ± 0.03 | -0.0 ± 0.01 | 4.2 ± 0.3   |
| pDVA12-mD12 | H-A                                   | 2.0 ± 0.1   | 1.3 ± 0.05  | -38 ± 1.5   |
| pDVA12-mG12 | H-G                                   | 1.3 ± 0.2   | 4.5 ± 0.04  | 58 ± 1.9    |
| pDVA12-mV12 | H-U                                   | -2.4 ± 0.1  | 0.4 ± 0.01  | 4.2 ± 0.3   |
